# Supplementary material for: Synthesis, physical properties and self-assembly behavior of azole-fused pyrene derivatives
Source: Royal Society of Chemistry journal article supplement (doi:10.1039/c3nr00523b), 2013-01-01
Supplement: c3nr00523b.pdf [file c3nr00523b.pdf]

**Supporting Information for**  
**Synthesis, physical properties and self-assembly behavior**  
**of azole-fused pyrene derivatives**

Jinchong Xiao,<sup>\*a</sup> Xuyu Xiao,<sup>a</sup> Yanlei Zhao,<sup>a</sup> Bo Wu,<sup>c</sup> Zhenying Liu,<sup>a</sup> Xuemin Zhang,<sup>a</sup>  
Sujuan Wang,<sup>a</sup> Xiaohui Zhao,<sup>b</sup> Lei Liu,<sup>a</sup> Li Jiang<sup>\*c</sup>

<sup>a</sup> Key laboratory of Chemical Biology of Hebei Province, College of Chemistry and Environmental Science, Hebei University, Baoding 071002, P. R. China E-mail:

<sup>b</sup> College of Physics Science and Technology, Hebei University, Baoding 071002, P. R. China

<sup>c</sup> Beijing National Laboratory for Molecular Sciences, Laboratory of Molecular Nanostructure and Nanotechnology, Institute of Chemistry, Beijing 100190, P. R. China

E-mail: [jcxiaoiccas@gmail.com](mailto:jcxiaoiccas@gmail.com); [jiangli@iccas.ac.cn](mailto:jiangli@iccas.ac.cn)

**Contents**

|        |       |         |
|--------|-------|---------|
| Figure |       |         |
| S1—S3  | ..... | p       |
| Figure |       |         |
| S4     | ..... | page S2 |
| Figure |       |         |
| S5     | ..... | page S3 |
| Figure |       |         |
| S6     | ..... | page S4 |
| Figure |       |         |
| S7     | ..... | page S4 |
| Figure |       |         |
| S8     | ..... | page S5 |
| Figure |       |         |
| S9     | ..... | page S5 |
| Figure |       |         |
| S10    | ..... | page S6 |
| Figure |       |         |
| S11    | ..... | page S6 |

|                 |     |         |
|-----------------|-----|---------|
| Figure S13..... | S12 | and     |
| Figure S14..... |     | page S7 |
|                 |     | page S8 |

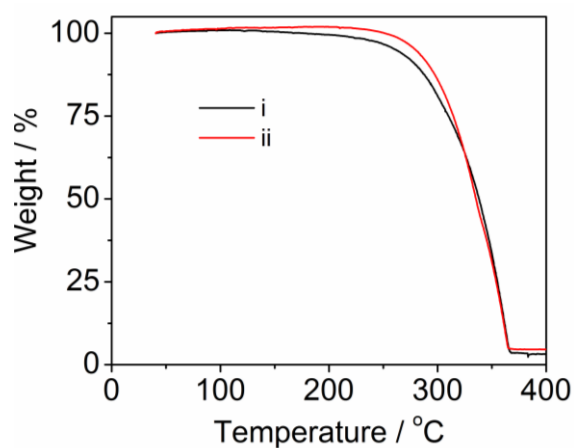

**Figure S1** Thermal gravimetric analysis of **PyS** (i, black line) and **PySe** (ii, red line) with a heating rate of 10 degree/min under nitrogen.

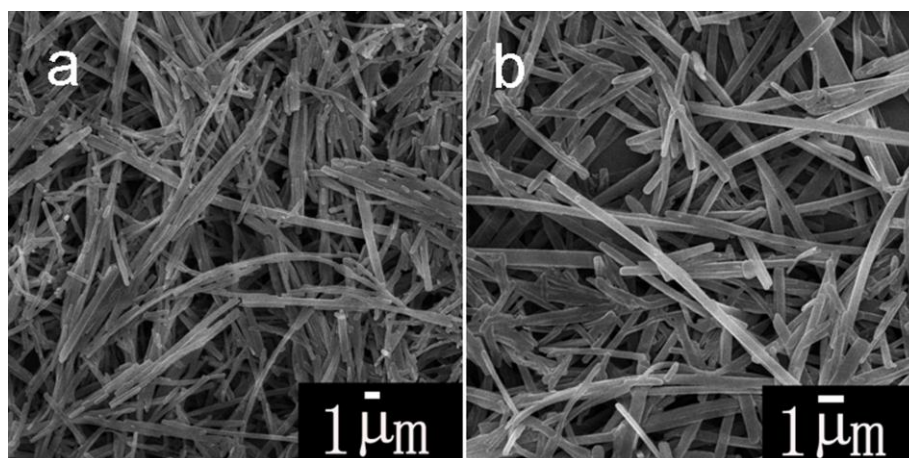

**Figure S2** (a) FESEM image of self-assembled **PyS** nanowires ( $V_{\text{THF}}:V_{\text{CTAB}} = 1:11$ ,  $[c]_{\text{CTAB}} = 0.5$  mg/mL), (b) FESEM image of self-assembled **PyS** nanowires ( $V_{\text{THF}}:V_{\text{CTAB}} = 1:5$ ,  $[c]_{\text{CTAB}} = 0.5$  mg/mL)  $\mu\text{m}$

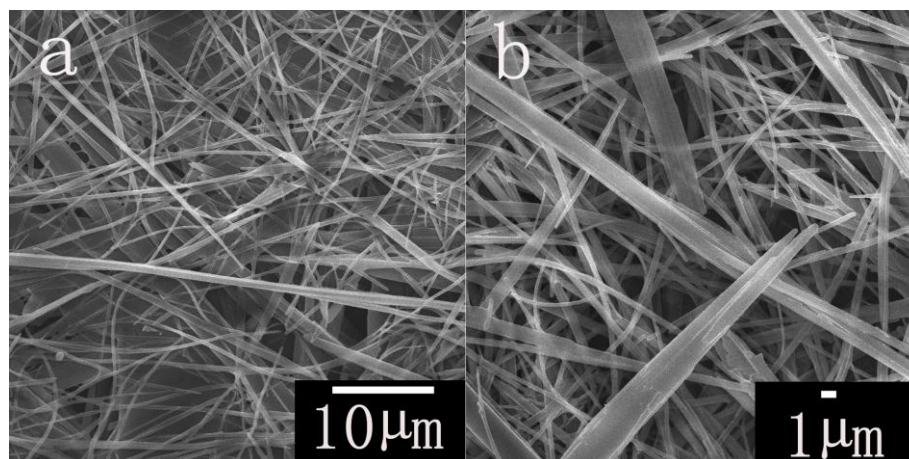

**Figure S3** FESEM image of self-assembled **PyS** wires (a) ( $V_{\text{THF}}:V_{\text{CTAB}} = 1:11$ ,  $[c]_{\text{CTAB}} = 0.1$  mg/mL), (b) ( $V_{\text{THF}}:V_{\text{CTAB}} = 1:11$ ,  $[c]_{\text{CTAB}} = 0.05$  mg/mL).

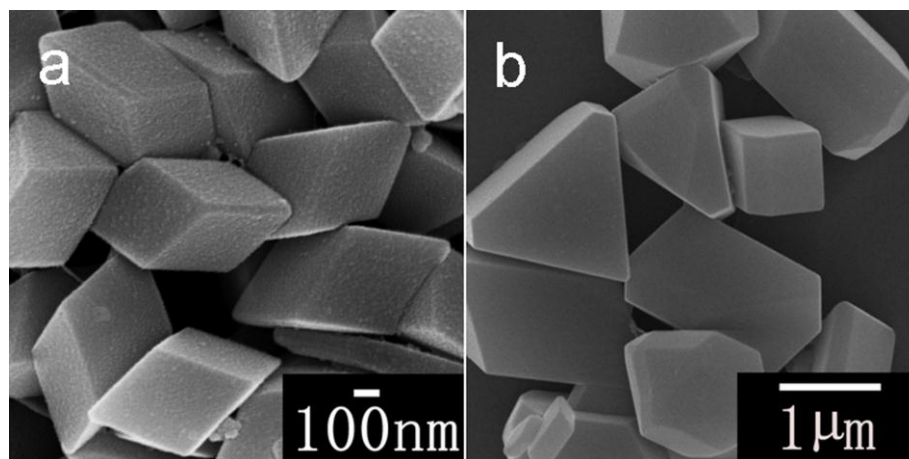

**Figure S4** (a) FESEM image of self-assembled **PySe** quadrangulars ( $V_{\text{THF}}:V_{\text{CTAB}} = 1:7$ )  
(b) FESEM image of self-assembled **PySe** microstructures ( $V_{\text{THF}}:V_{\text{CTAB}} = 1:5$ )

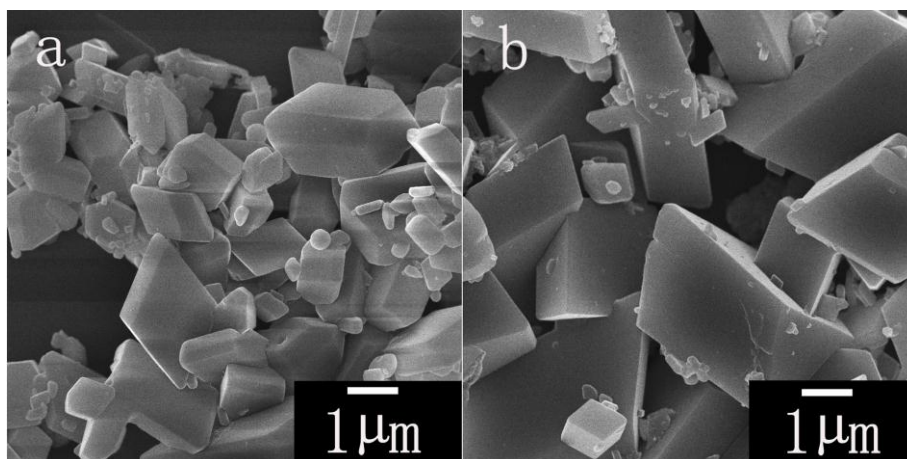

**Figure S5** FESEM image of self-assembled PySe structures (a) ( $V_{\text{THF}}:V_{\text{CTAB}} = 1:11$ ,  $[c]_{\text{CTAB}} = 0.1$  mg/mL), (b) ( $V_{\text{THF}}:V_{\text{CTAB}} = 1:11$ ,  $[c]_{\text{CTAB}} = 0.05$  mg/mL).

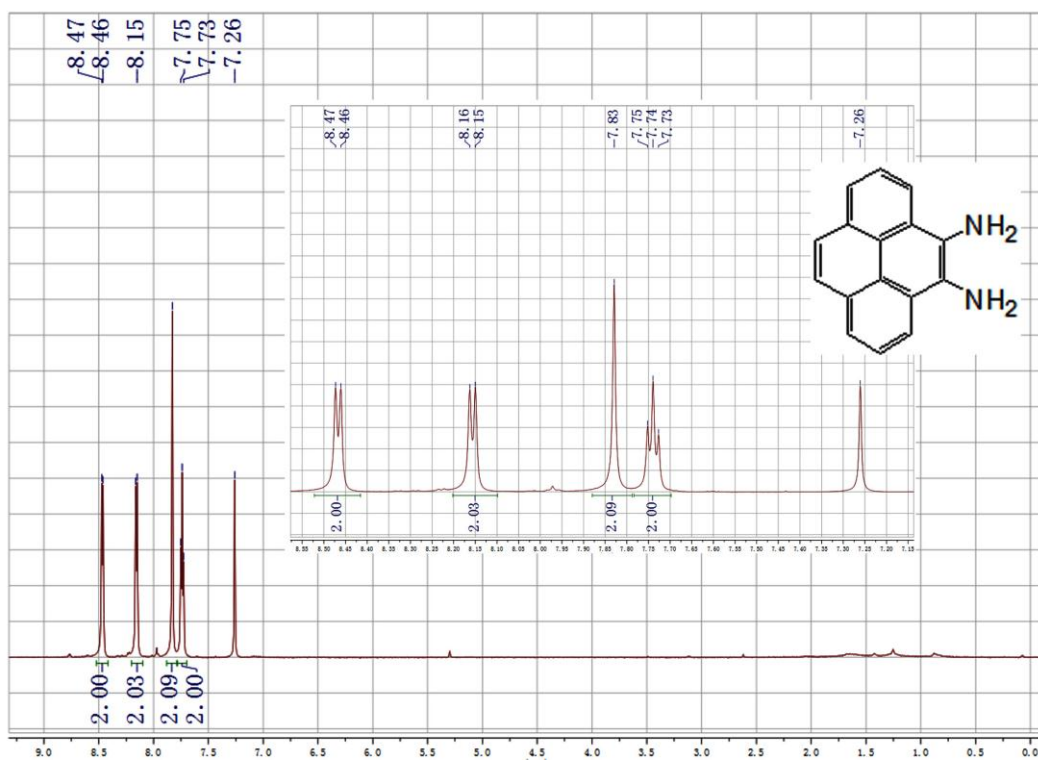

**Figure S6**  $^1\text{H}$  NMR spectrum of compound 3

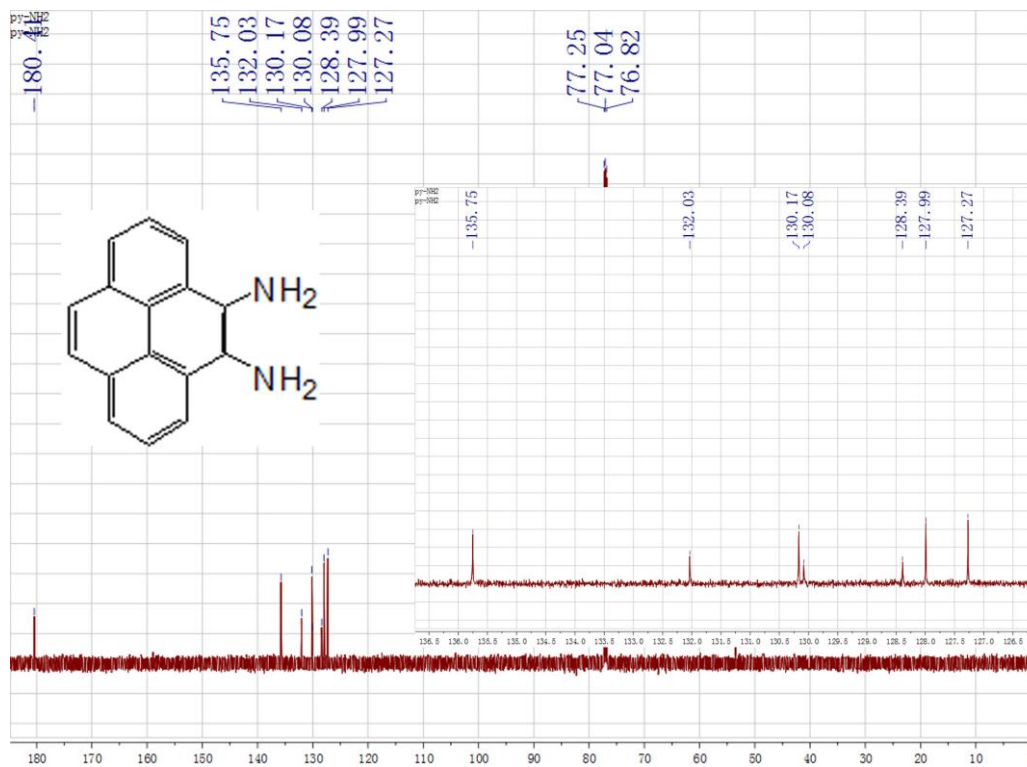

Figure S7 <sup>13</sup>C NMR spectrum of compound 3

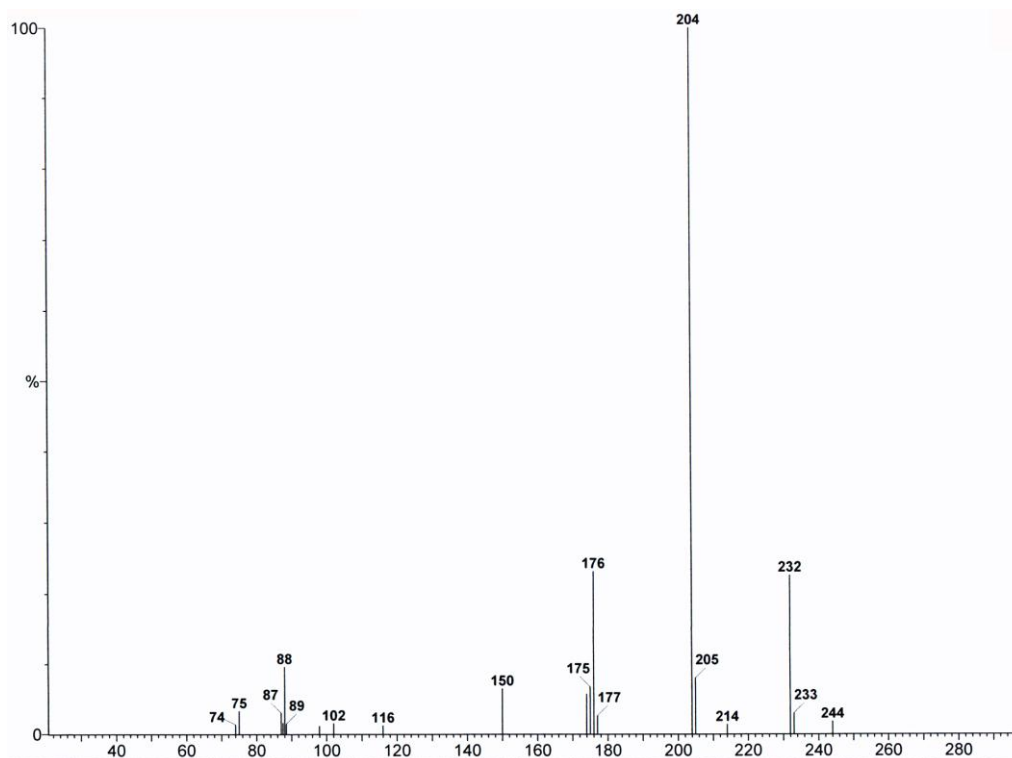

Figure S8 EI spectrum of compound 3

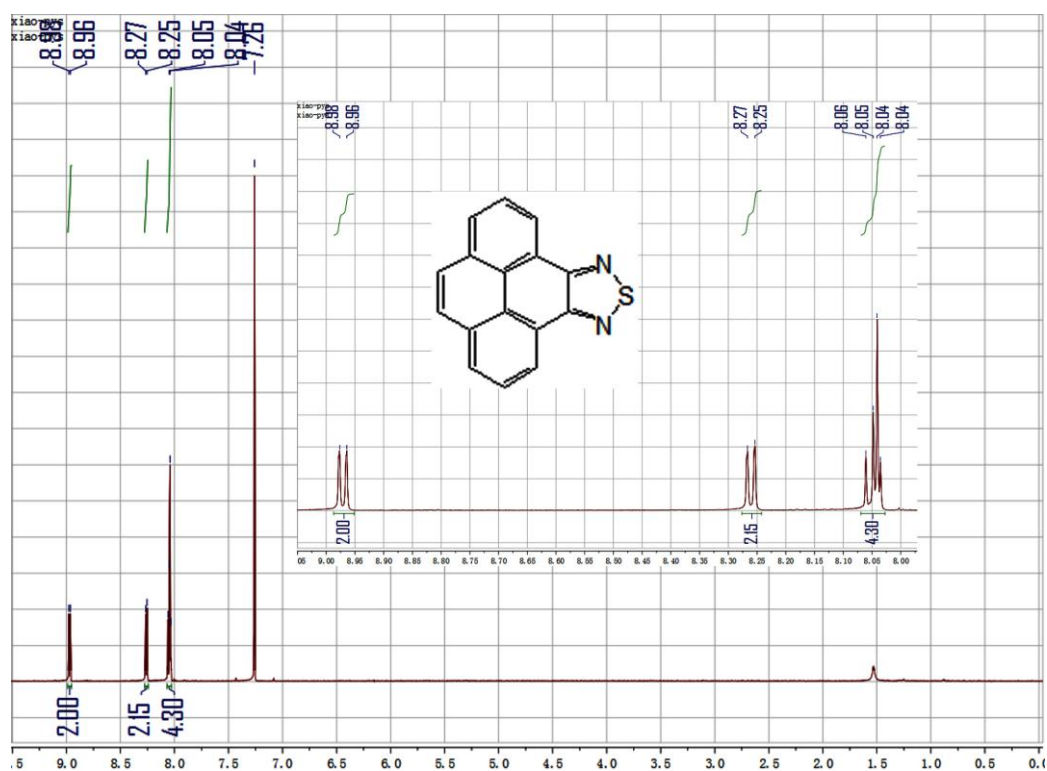

Figure S9 <sup>1</sup>H NMR spectrum of compound PyS

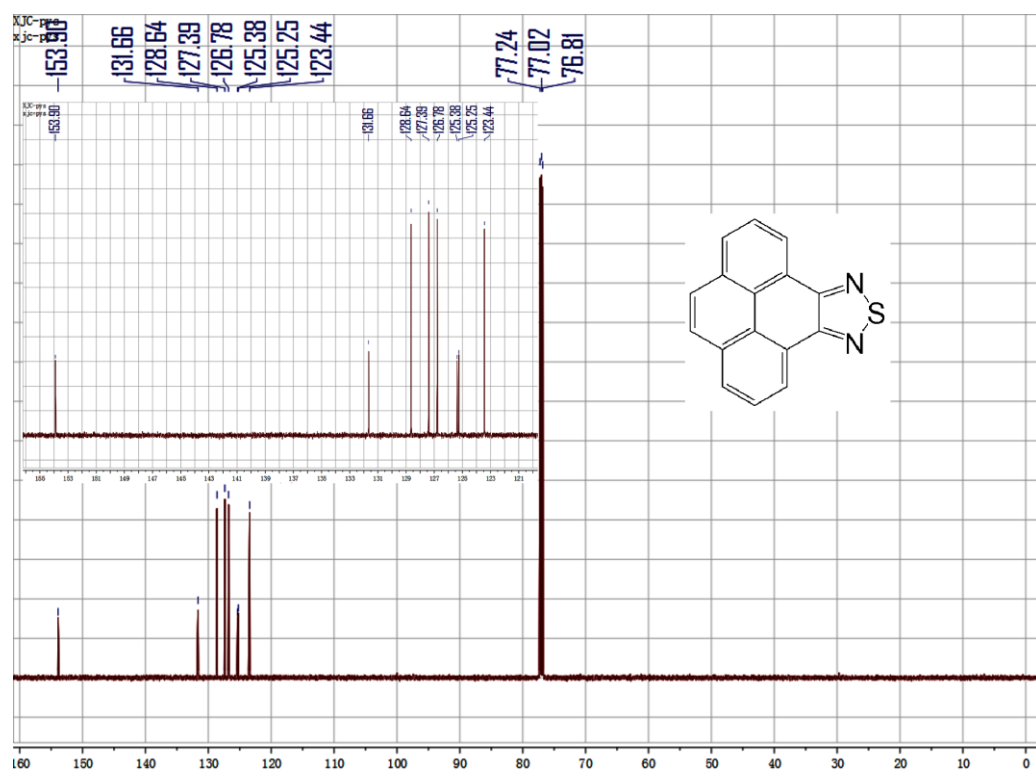

Figure S10 <sup>13</sup>C NMR spectrum of compound PyS



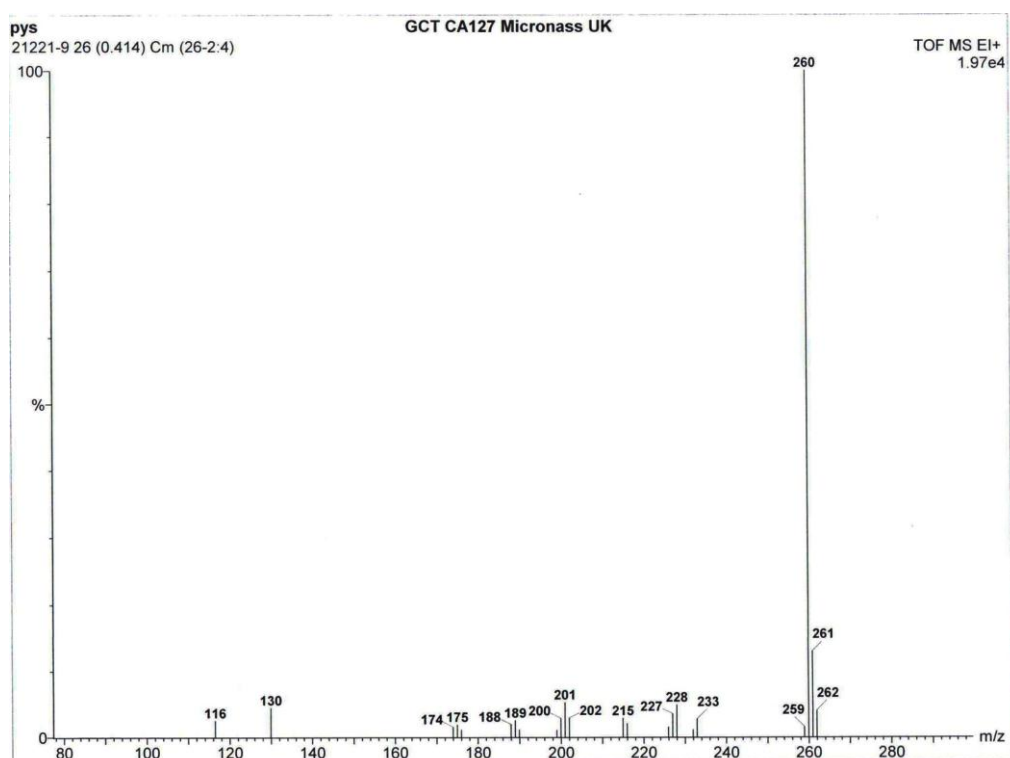

Figure S11 EI spectrum of compound PyS

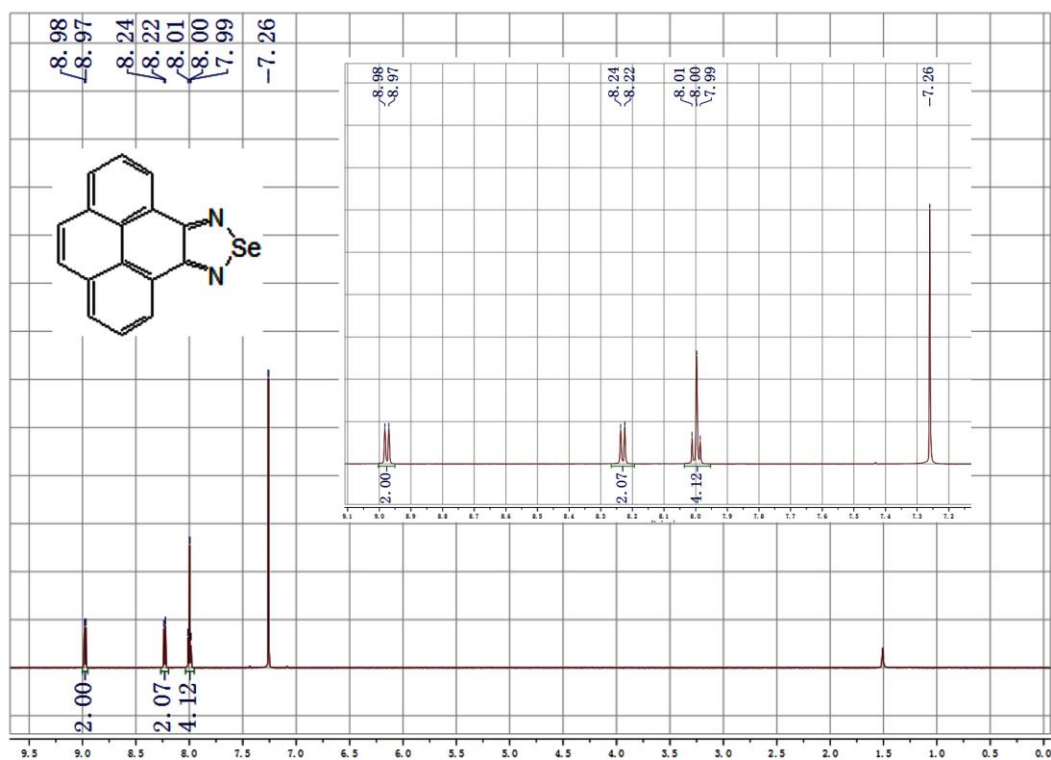

Figure S12 <sup>1</sup>H NMR spectrum of compound PySe

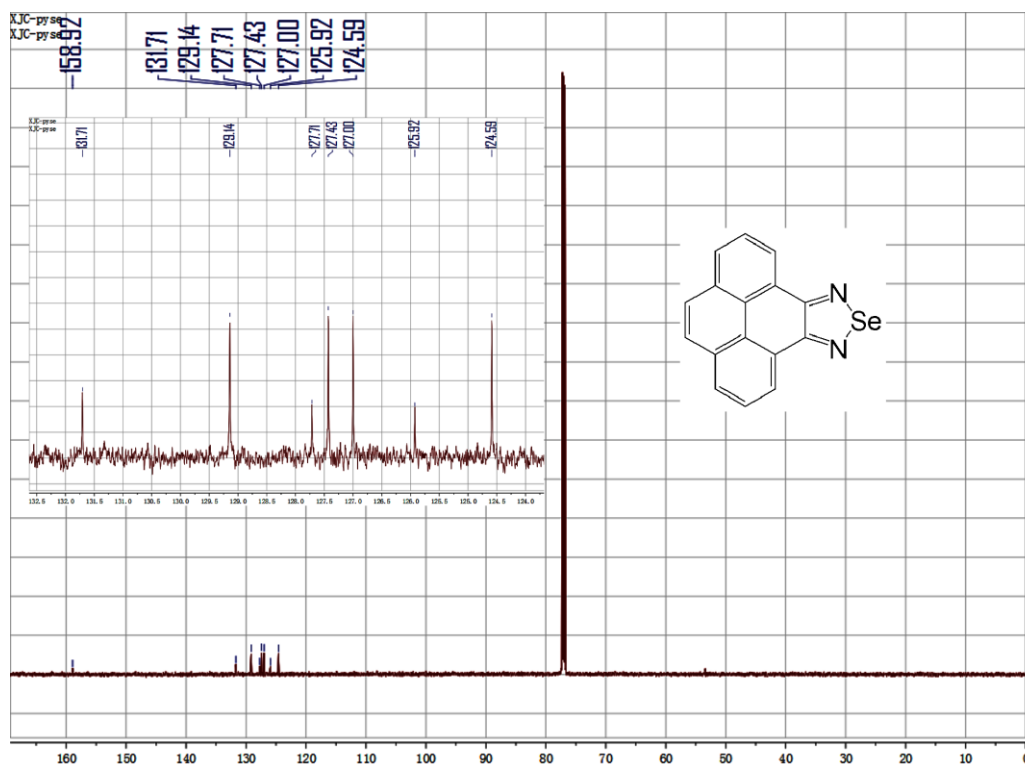

Figure S13  $^{13}\text{C}$  NMR spectrum of compound PySe

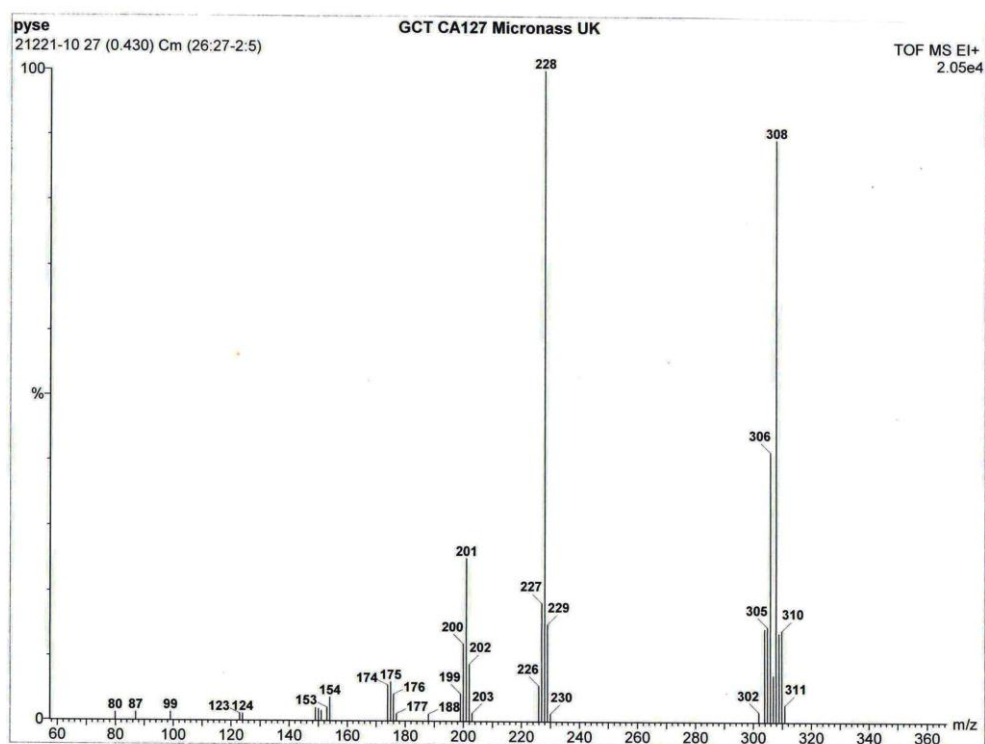

Figure S14 EI spectrum of compound PySe
